# Supplementary material for: Study of 405 nm Laser-Induced Time-Resolved Photoluminescence Spectroscopy on Spinel and Alexandrite
Source: MDPI journal article supplement (doi:10.3390/min13030419), 2023-03-16
Supplement: s1 [file s1]

Table S1: Decay curves of the analyzed spinel samples.

| NatSp1  |        | NatSp2  |        | NatSp3  |        | NatSp4  |        | NatSp5  |       | NatSp6  |        | NatSp7  |       | NatSp8  |        | FLGSp1  |        | FLGSp2  |        | FLGSp3  |        | FLGSp4  |        | NatSp6 800 |        | NatSp7 750 |        | NatSp8 700 |        |         |        |
|---------|--------|---------|--------|---------|--------|---------|--------|---------|-------|---------|--------|---------|-------|---------|--------|---------|--------|---------|--------|---------|--------|---------|--------|------------|--------|------------|--------|------------|--------|---------|--------|
| Time    | Inten  | Time    | Inten  | Time    | Inten  | Time    | Inten  | Time    | Inten | Time    | Inten  | Time    | Inten | Time    | Inten  | Time    | Inten  | Time    | Inten  | Time    | Inten  | Time    | Inten  | Time       | Inten  | Time       | Inten  | Time       | Inten  | Time    | Inten  |
| (10n m) | sity   | (10n m) | sity  | (10n m) | sity   | (10n m) | sity  | (10n m) | sity   | (10n m) | sity   | (10n m) | sity   | (10n m) | sity   | (10n m) | sity   | (10n m)    | sity   | (10n m)    | sity   | (10n m)    | sity   | (10n m) | sity   |
| o       | 100.00 | o       | 100.00 | o       | 100.00 | o       | 100.00 | o       | 99.98 | o       | 100.00 | o       | 99.15 | o       | 100.00 | o          | 100.00 | o          | 100.00 | o          | 100.00 | o       | 100.00 |
| 199     | 95.74  | 199     | 88.20  | 220     | 88.75  | 215     | 98.37  | 187     | 93.00 | 176     | 94.13  | 150     | 92.19 | 235     | 87.22  | 200     | 70.30  | 231     | 85.20  | 195     | 77.27  | 214     | 88.76  | 235        | 84.33  | 150        | 94.87  | 234        | 83.54  |         |        |
| 399     | 81.65  | 399     | 78.68  | 385     | 81.53  | 386     | 92.89  | 375     | 73.93 | 395     | 82.30  | 375     | 81.64 | 470     | 74.18  | 399     | 53.06  | 423     | 69.62  | 389     | 59.11  | 429     | 53.58  | 422        | 66.64  | 375        | 78.46  | 469        | 70.89  |         |        |
| 549     | 73.88  | 599     | 70.63  | 604     | 73.44  | 601     | 83.52  | 562     | 61.82 | 571     | 74.94  | 599     | 72.87 | 705     | 64.33  | 559     | 42.92  | 615     | 57.95  | 584     | 47.52  | 600     | 39.05  | 610        | 54.87  | 599        | 66.04  | 704        | 60.50  |         |        |
| 748     | 64.65  | 798     | 63.41  | 824     | 65.49  | 772     | 77.12  | 750     | 52.71 | 790     | 66.33  | 749     | 68.00 | 940     | 55.81  | 758     | 34.67  | 807     | 49.19  | 778     | 39.09  | 815     | 28.09  | 798        | 45.78  | 749        | 59.28  | 939        | 51.98  |         |        |
| 948     | 57.21  | 998     | 56.57  | 988     | 60.65  | 987     | 69.23  | 984     | 43.69 | 966     | 60.26  | 974     | 60.39 | 1175    | 48.29  | 958     | 27.73  | 999     | 42.16  | 973     | 32.43  | 986     | 22.27  | 985        | 38.64  | 974        | 50.75  | 1174       | 44.89  |         |        |
| 1147    | 50.79  | 1197    | 51.25  | 1208    | 54.18  | 1201    | 62.43  | 1172    | 37.94 | 1185    | 53.95  | 1124    | 56.23 | 1410    | 42.46  | 1157    | 22.94  | 1191    | 36.11  | 1167    | 26.95  | 1201    | 17.09  | 1220       | 31.50  | 1124       | 46.36  | 1409       | 38.91  |         |        |
| 1347    | 44.95  | 1397    | 46.29  | 1373    | 50.25  | 1373    | 57.28  | 1360    | 33.22 | 1361    | 49.36  | 1348    | 50.36 | 1645    | 36.77  | 1357    | 18.90  | 1383    | 31.26  | 1362    | 22.37  | 1372    | 13.98  | 1407       | 26.85  | 1348       | 40.25  | 1644       | 33.82  |         |        |
| 1547    | 40.07  | 1547    | 42.80  | 1592    | 45.17  | 1587    | 51.94  | 1547    | 28.94 | 1580    | 44.09  | 1573    | 45.13 | 1880    | 32.47  | 1556    | 15.71  | 1575    | 27.25  | 1595    | 18.75  | 1587    | 10.93  | 1595       | 23.28  | 1573       | 35.08  | 1879       | 29.73  |         |        |
| 1746    | 35.87  | 1746    | 38.65  | 1757    | 41.68  | 1759    | 47.61  | 1735    | 25.49 | 1756    | 40.40  | 1723    | 42.16 | 2115    | 28.42  | 1756    | 13.09  | 1767    | 24.03  | 1790    | 15.96  | 1801    | 8.92   | 1783       | 20.26  | 1723       | 32.22  | 2114       | 25.67  |         |        |
| 1946    | 32.15  | 1946    | 35.02  | 1977    | 37.68  | 1974    | 43.09  | 1969    | 21.93 | 1932    | 36.80  | 1948    | 37.81 | 2349    | 25.04  | 1955    | 11.14  | 1997    | 20.47  | 1984    | 13.82  | 1973    | 7.48   | 1970       | 17.70  | 1948       | 28.34  | 2349       | 22.54  |         |        |
| 2145    | 28.64  | 2145    | 31.64  | 2196    | 33.94  | 2145    | 39.72  | 2157    | 19.53 | 2151    | 32.84  | 2172    | 34.15 | 2584    | 22.03  | 2155    | 9.59   | 2189    | 17.92  | 2179    | 11.90  | 2187    | 6.10   | 2205       | 14.92  | 2172       | 25.04  | 2583       | 19.42  |         |        |
| 2345    | 25.79  | 2345    | 28.58  | 2361    | 31.35  | 2360    | 36.01  | 2345    | 17.23 | 2327    | 30.27  | 2322    | 31.60 | 2819    | 19.48  | 2354    | 8.08   | 2381    | 15.68  | 2373    | 10.17  | 2359    | 5.26   | 2392       | 13.08  | 2322       | 22.98  | 2818       | 17.19  |         |        |
| 2545    | 23.06  | 2545    | 25.90  | 2581    | 28.60  | 2574    | 32.47  | 2532    | 15.40 | 2546    | 27.16  | 2547    | 28.51 | 3054    | 17.03  | 2554    | 7.07   | 2573    | 13.88  | 2568    | 8.92   | 2574    | 4.41   | 2580       | 11.63  | 2547       | 20.04  | 3053       | 14.94  |         |        |
| 2744    | 20.91  | 2744    | 23.40  | 2745    | 26.48  | 2746    | 29.97  | 2720    | 13.70 | 2722    | 24.93  | 2697    | 26.51 | 3289    | 15.17  | 2753    | 5.88   | 2765    | 12.39  | 2762    | 7.77   | 2788    | 3.52   | 2767       | 10.23  | 2697       | 18.45  | 3288       | 13.30  |         |        |
| 2944    | 18.83  | 2944    | 21.63  | 2965    | 23.95  | 2960    | 27.33  | 2954    | 11.86 | 2941    | 22.45  | 2921    | 24.19 | 3524    | 13.26  | 2953    | 5.09   | 2957    | 10.87  | 2957    | 6.78   | 2960    | 3.14   | 2955       | 9.05   | 2921       | 16.30  | 3523       | 11.79  |         |        |
| 3143    | 17.07  | 3143    | 19.23  | 3130    | 21.97  | 3132    | 25.10  | 3142    | 10.54 | 3117    | 20.57  | 3146    | 21.69 | 3759    | 11.82  | 3112    | 4.59   | 3149    | 9.58   | 3151    | 5.95   | 3174    | 2.69   | 3143       | 8.05   | 3146       | 14.63  | 3758       | 10.33  |         |        |
| 3343    | 15.26  | 3343    | 17.54  | 3349    | 19.94  | 3346    | 22.67  | 3329    | 9.42  | 3336    | 18.53  | 3296    | 20.34 | 3994    | 10.43  | 3312    | 3.91   | 3341    | 8.60   | 3346    | 5.19   | 3346    | 2.28   | 3377       | 7.00   | 3296       | 13.54  | 3993       | 9.28   |         |        |
| 3543    | 13.76  | 3543    | 16.19  | 3569    | 18.10  | 3561    | 20.67  | 3517    | 8.50  | 3512    | 17.00  | 3521    | 18.19 | 4229    | 9.29   | 3511    | 3.42   | 3572    | 7.52   | 3540    | 4.51   | 3560    | 1.97   | 3565       | 6.20   | 3521       | 11.89  | 4228       | 7.93   |         |        |
| 3692    | 12.59  | 3742    | 14.42  | 3733    | 16.62  | 3732    | 19.11  | 3705    | 7.64  | 3732    | 15.33  | 3745    | 16.51 | 4464    | 8.27   | 3711    | 3.02   | 3764    | 6.76   | 3735    | 3.99   | 3732    | 1.76   | 3752       | 5.53   | 3745       | 10.56  | 4463       | 7.05   |         |        |
| 3892    | 11.50  | 3942    | 13.15  | 3953    | 15.06  | 3947    | 17.39  | 3892    | 6.84  | 3907    | 14.04  | 3895    | 15.59 | 4698    | 7.31   | 3910    | 2.61   | 3956    | 5.93   | 3929    | 3.54   | 3946    | 1.42   | 3940       | 4.82   | 3895       | 9.84   | 4698       | 6.22   |         |        |
| 4091    | 10.42  | 4141    | 11.95  | 4118    | 14.07  | 4119    | 15.93  | 4127    | 6.05  | 4127    | 12.69  | 4120    | 13.88 | 4933    | 6.48   | 4110    | 2.35   | 4148    | 5.32   | 4124    | 3.13   | 4161    | 1.26   | 4128       | 4.32   | 4120       | 8.76   | 4932       | 5.58   |         |        |
| 4291    | 9.38   | 4341    | 10.98  | 4337    | 12.68  | 4333    | 14.47  | 4314    | 5.38  | 4302    | 11.79  | 4270    | 12.98 | 5168    | 5.75   | 4309    | 1.97   | 4340    | 4.82   | 4318    | 2.67   | 4332    | 1.11   | 4362       | 3.81   | 4270       | 8.10   | 5167       | 4.91   |         |        |
| 4491    | 8.54   | 4541    | 9.95   | 4557    | 11.44  | 4505    | 13.41  | 4502    | 4.86  | 4522    | 10.58  | 4494    | 11.77 | 5403    | 5.07   | 4509    | 1.76   | 4532    | 4.28   | 4513    | 2.48   | 4547    | 0.88   | 4550       | 3.41   | 4494       | 7.27   | 5402       | 4.24   |         |        |
| 4690    | 7.76   | 4690    | 9.16   | 4722    | 10.66  | 4719    | 12.13  | 4690    | 4.33  | 4697    | 9.72   | 4719    | 10.58 | 5638    | 4.56   | 4708    | 1.51   | 4724    | 3.86   | 4707    | 2.11   | 4719    | 0.77   | 4737       | 3.10   | 4719       | 6.46   | 5637       | 3.84   |         |        |
| 4890    | 6.91   | 4890    | 8.40   | 4941    | 9.65   | 4934    | 11.04  | 4877    | 3.90  | 4917    | 8.91   | 4869    | 9.96  | 5873    | 4.02   | 4908    | 1.34   | 4916    | 3.50   | 4902    | 1.85   | 4933    | 0.68   | 4925       | 2.78   | 4869       | 5.91   | 5872       | 3.38   |         |        |
| 5089    | 6.36   | 5090    | 7.67   | 5106    | 9.01   | 5105    | 10.45  | 5112    | 3.49  | 5092    | 8.16   | 5093    | 8.88  | 6108    | 3.62   | 5107    | 1.12   | 5108    | 3.06   | 5096    | 1.69   | 5105    | 0.57   | 5112       | 2.48   | 5093       | 5.32   | 6107       | 2.97   |         |        |
| 5289    | 5.68   | 5289    | 6.91   | 5326    | 8.22   | 5320    | 9.24   | 5299    | 3.06  | 5312    | 7.29   | 5318    | 8.07  | 6343    | 3.17   | 5307    | 1.05   | 5338    | 2.73   | 5291    | 1.47   | 5319    | 0.48   | 5347       | 2.26   | 5318       | 4.86   | 6342       | 2.61   |         |        |
| 5489    | 5.14   | 5489    | 6.34   | 5490    | 7.62   | 5491    | 8.62   | 5487    | 2.82  | 5488    | 6.75   | 5468    | 7.57  | 6578    | 2.80   | 5506    | 0.93   | 5530    | 2.54   | 5524    | 1.27   | 5534    | 0.47   | 5535       | 1.99   | 5468       | 4.40   | 6577       | 2.36   |         |        |
| 5688    | 4.71   | 5688    | 5.83   | 5710    | 6.82   | 5706    | 7.87   | 5674    | 2.50  | 5663    | 6.24   | 5693    | 6.91  | 6813    | 2.52   | 5666    | 0.76   | 5722    | 2.14   | 5719    | 1.11   | 5705    | 0.44   | 5722       | 1.75   | 5693       | 4.03   | 6812       | 2.08   |         |        |
| 5888    | 4.33   | 5888    | 5.31   | 5929    | 6.20   | 5877    | 7.21   | 5862    | 2.26  | 5883    | 5.62   | 5842    | 6.35  | 7047    | 2.24   | 5865    | 0.67   | 5914    | 2.00   | 5913    | 0.94   | 5920    | 0.36   | 5910       | 1.64   | 5842       | 3.74   | 7047       | 1.85   |         |        |
| 6087    | 3.90   | 6088    | 4.82   | 6094    | 5.77   | 6092    | 6.63   | 6097    | 1.98  | 6058    | 5.19   | 6067    | 5.88  | 7282    | 2.05   | 6065    | 0.63   | 6106    | 1.74   | 6108    |        |         |        |            |        |            |        |            |        |         |        |

|       |      |       |      |       |      |       |      |       |      |       |      |       |      |       |      |      |      |       |      |      |      |  |  |       |      |       |      |       |      |  |
|-------|------|-------|------|-------|------|-------|------|-------|------|-------|------|-------|------|-------|------|------|------|-------|------|------|------|--|--|-------|------|-------|------|-------|------|--|
| 9431  | 0.76 | 9431  | 1.00 | 9443  | 1.30 | 9438  | 1.52 | 9426  | 0.31 | 9395  | 1.11 | 9438  | 1.40 | 11276 | 0.30 | 9417 | 0.05 | 9447  | 0.25 | 9453 | 0.05 |  |  | 9427  | 0.23 | 9438  | 0.66 | 11275 | 0.20 |  |
| 9630  | 0.67 | 9630  | 0.94 | 9663  | 1.09 | 9610  | 1.44 | 9614  | 0.27 | 9614  | 1.06 | 9587  | 1.26 | 11511 | 0.26 | 9616 | 0.00 | 9639  | 0.21 | 9648 | 0.00 |  |  | 9662  | 0.20 | 9587  | 0.57 | 11510 | 0.16 |  |
| 9780  | 0.62 | 9830  | 0.85 | 9827  | 1.09 | 9824  | 1.24 | 9802  | 0.26 | 9790  | 0.96 | 9812  | 1.12 | 11745 | 0.24 | 9816 | 0.04 | 9831  | 0.18 | 9848 | 0.04 |  |  | 9849  | 0.25 | 9812  | 0.53 | 11745 | 0.15 |  |
| 9980  | 0.60 | 10030 | 0.79 | 10047 | 0.94 | 10039 | 1.16 | 9989  | 0.21 | 10009 | 0.87 | 9962  | 1.02 | 11980 | 0.17 |      |      | 10023 | 0.13 |      |      |  |  | 10037 | 0.17 | 9962  | 0.50 | 11979 | 0.13 |  |
| 10179 | 0.50 | 10229 | 0.73 | 10212 | 0.88 | 10210 | 1.06 | 10224 | 0.18 | 10185 | 0.81 | 10187 | 0.91 | 12215 | 0.15 |      |      | 10215 | 0.12 |      |      |  |  | 10225 | 0.16 | 10187 | 0.41 | 12214 | 0.07 |  |
| 10379 | 0.48 | 10429 | 0.65 | 10431 | 0.83 | 10425 | 0.95 | 10411 | 0.15 | 10404 | 0.70 | 10411 | 0.85 | 12450 | 0.14 |      |      | 10445 | 0.10 |      |      |  |  | 10412 | 0.14 | 10411 | 0.43 | 12449 | 0.10 |  |
| 10578 | 0.41 | 10628 | 0.54 | 10596 | 0.74 | 10596 | 0.89 | 10599 | 0.14 | 10580 | 0.64 | 10561 | 0.77 | 12685 | 0.12 |      |      | 10637 | 0.13 |      |      |  |  | 10647 | 0.15 | 10561 | 0.36 | 12684 | 0.12 |  |
| 10778 | 0.40 | 10778 | 0.54 | 10816 | 0.68 | 10811 | 0.78 | 10787 | 0.16 | 10799 | 0.60 | 10786 | 0.73 | 12920 | 0.17 |      |      | 10829 | 0.10 |      |      |  |  | 10834 | 0.09 | 10786 | 0.26 | 12919 | 0.08 |  |
| 10978 | 0.33 | 10978 | 0.47 | 11035 | 0.59 | 11025 | 0.69 | 10974 | 0.10 | 10975 | 0.57 | 11011 | 0.64 | 13155 | 0.09 |      |      | 11021 | 0.05 |      |      |  |  | 11022 | 0.14 | 11011 | 0.32 | 13154 | 0.07 |  |
| 11177 | 0.31 | 11177 | 0.43 | 11200 | 0.56 | 11197 | 0.65 | 11162 | 0.11 | 11195 | 0.49 | 11160 | 0.56 | 13390 | 0.10 |      |      | 11213 | 0.05 |      |      |  |  | 11209 | 0.04 | 11160 | 0.28 | 13389 | 0.06 |  |
| 11377 | 0.28 | 11377 | 0.42 | 11419 | 0.51 | 11412 | 0.63 | 11396 | 0.08 | 11370 | 0.43 | 11385 | 0.56 | 13625 | 0.07 |      |      | 11405 | 0.03 |      |      |  |  | 11397 | 0.05 | 11385 | 0.22 | 13624 | 0.03 |  |
| 11576 | 0.22 | 11577 | 0.36 | 11584 | 0.47 | 11583 | 0.58 | 11584 | 0.06 | 11590 | 0.41 | 11535 | 0.50 | 13860 | 0.11 |      |      | 11597 | 0.00 |      |      |  |  | 11632 | 0.11 | 11535 | 0.23 | 13859 | 0.02 |  |
| 11776 | 0.23 | 11776 | 0.32 | 11804 | 0.41 | 11798 | 0.51 | 11771 | 0.03 | 11765 | 0.40 | 11760 | 0.44 | 14094 | 0.05 |      |      | 11789 | 0.00 |      |      |  |  | 11819 | 0.05 | 11760 | 0.19 | 14094 | 0.04 |  |
| 11976 | 0.18 | 11976 | 0.31 | 11968 | 0.39 | 11969 | 0.49 | 11959 | 0.05 | 11985 | 0.36 | 11984 | 0.42 | 14329 | 0.06 |      |      |       |      |      |      |  |  | 12007 | 0.10 | 11984 | 0.19 | 14328 | 0.01 |  |
| 12175 | 0.16 | 12175 | 0.29 | 12188 | 0.34 | 12184 | 0.44 | 12147 | 0.04 | 12160 | 0.36 | 12134 | 0.35 | 14564 | 0.05 |      |      |       |      |      |      |  |  | 12194 | 0.08 | 12134 | 0.14 | 14563 | 0.02 |  |
| 12375 | 0.13 | 12375 | 0.24 | 12408 | 0.32 | 12398 | 0.37 | 12381 | 0.03 | 12380 | 0.33 | 12359 | 0.35 | 14799 | 0.03 |      |      |       |      |      |      |  |  | 12382 | 0.07 | 12359 | 0.10 | 14798 | 0.00 |  |
| 12574 | 0.18 | 12575 | 0.21 | 12572 | 0.29 | 12570 | 0.35 | 12569 | 0.02 | 12555 | 0.31 | 12583 | 0.28 | 15034 | 0.03 |      |      |       |      |      |      |  |  | 12570 | 0.06 | 12583 | 0.12 |       |      |  |
| 12774 | 0.08 | 12774 | 0.21 | 12792 | 0.26 | 12784 | 0.31 | 12756 | 0.01 | 12775 | 0.23 | 12733 | 0.28 | 15269 | 0.00 |      |      |       |      |      |      |  |  | 12804 | 0.06 | 12733 | 0.07 |       |      |  |
| 12924 | 0.11 | 12974 | 0.15 | 12957 | 0.24 | 12956 | 0.28 | 12944 | 0.00 | 12951 | 0.22 | 12958 | 0.25 |       |      |      |      |       |      |      |      |  |  | 12992 | 0.06 | 12958 | 0.04 |       |      |  |
| 13123 | 0.09 | 13173 | 0.15 | 13176 | 0.18 | 13170 | 0.24 |       |      | 13170 | 0.22 | 13108 | 0.24 |       |      |      |      |       |      |      |      |  |  | 13179 | 0.06 | 13108 | 0.03 |       |      |  |
| 13323 | 0.12 | 13373 | 0.17 | 13396 | 0.19 | 13342 | 0.21 |       |      | 13346 | 0.18 | 13332 | 0.22 |       |      |      |      |       |      |      |      |  |  | 13367 | 0.02 | 13332 | 0.10 |       |      |  |
| 13523 | 0.05 | 13573 | 0.12 | 13561 | 0.17 | 13557 | 0.23 |       |      | 13521 | 0.16 | 13557 | 0.17 |       |      |      |      |       |      |      |      |  |  | 13554 | 0.04 | 13557 | 0.03 |       |      |  |
| 13722 | 0.04 | 13772 | 0.16 | 13780 | 0.13 | 13771 | 0.19 |       |      | 13741 | 0.15 | 13707 | 0.19 |       |      |      |      |       |      |      |      |  |  | 13789 | 0.00 | 13707 | 0.00 |       |      |  |
| 13922 | 0.04 | 13922 | 0.11 | 13945 | 0.11 | 13943 | 0.18 |       |      | 13916 | 0.16 | 13932 | 0.13 |       |      |      |      |       |      |      |      |  |  | 13977 | 0.03 |       |      |       |      |  |
| 14121 | 0.03 | 14121 | 0.09 | 14164 | 0.12 | 14157 | 0.14 |       |      | 14136 | 0.13 | 14156 | 0.16 |       |      |      |      |       |      |      |      |  |  |       |      |       |      |       |      |  |
| 14321 | 0.04 | 14321 | 0.05 | 14329 | 0.10 | 14329 | 0.13 |       |      | 14311 | 0.12 | 14306 | 0.17 |       |      |      |      |       |      |      |      |  |  |       |      |       |      |       |      |  |
| 14521 | 0.05 | 14521 | 0.10 | 14549 | 0.09 | 14543 | 0.11 |       |      | 14531 | 0.11 | 14531 | 0.12 |       |      |      |      |       |      |      |      |  |  |       |      |       |      |       |      |  |
| 14720 | 0.01 | 14720 | 0.06 | 14768 | 0.10 | 14715 | 0.11 |       |      | 14707 | 0.09 | 14681 | 0.11 |       |      |      |      |       |      |      |      |  |  |       |      |       |      |       |      |  |
| 14920 | 0.01 | 14920 | 0.06 | 14933 | 0.08 | 14929 | 0.12 |       |      | 14926 | 0.06 | 14905 | 0.09 |       |      |      |      |       |      |      |      |  |  |       |      |       |      |       |      |  |
| 15119 | 0.00 | 15119 | 0.02 | 15153 | 0.05 | 15144 | 0.10 |       |      | 15102 | 0.08 | 15130 | 0.06 |       |      |      |      |       |      |      |      |  |  |       |      |       |      |       |      |  |
| 15319 | 0.00 | 15319 | 0.02 | 15317 | 0.06 | 15315 | 0.09 |       |      | 15321 | 0.08 | 15280 | 0.07 |       |      |      |      |       |      |      |      |  |  |       |      |       |      |       |      |  |
|       |      | 15519 | 0.01 | 15537 | 0.06 | 15530 | 0.09 |       |      | 15497 | 0.07 | 15505 | 0.06 |       |      |      |      |       |      |      |      |  |  |       |      |       |      |       |      |  |
|       |      | 15718 | 0.02 | 15702 | 0.07 | 15702 | 0.07 |       |      | 15716 | 0.10 | 15729 | 0.07 |       |      |      |      |       |      |      |      |  |  |       |      |       |      |       |      |  |
|       |      | 15918 | 0.02 | 15921 | 0.05 | 15916 | 0.04 |       |      | 15892 | 0.06 | 15879 | 0.06 |       |      |      |      |       |      |      |      |  |  |       |      |       |      |       |      |  |
|       |      | 16117 | 0.00 | 16141 | 0.05 | 16131 | 0.04 |       |      | 16111 | 0.06 | 16104 | 0.06 |       |      |      |      |       |      |      |      |  |  |       |      |       |      |       |      |  |
|       |      |       |      | 16306 | 0.02 | 16302 | 0.03 |       |      | 16287 | 0.04 | 16254 | 0.02 |       |      |      |      |       |      |      |      |  |  |       |      |       |      |       |      |  |
|       |      |       |      | 16525 | 0.02 | 16517 | 0.04 |       |      | 16506 | 0.03 | 16478 | 0.03 |       |      |      |      |       |      |      |      |  |  |       |      |       |      |       |      |  |
|       |      |       |      | 16690 | 0.00 | 16688 | 0.02 |       |      | 16682 | 0.03 | 16703 | 0.03 |       |      |      |      |       |      |      |      |  |  |       |      |       |      |       |      |  |
|       |      |       |      | 16903 | 0.02 | 16903 | 0.02 |       |      | 16902 | 0.04 | 16853 | 0.00 |       |      |      |      |       |      |      |      |  |  |       |      |       |      |       |      |  |
|       |      |       |      | 17074 | 0.00 | 17074 | 0.00 |       |      | 17077 | 0.07 | 17077 | 0.03 |       |      |      |      |       |      |      |      |  |  |       |      |       |      |       |      |  |
|       |      |       |      |       |      |       |      |       |      | 17253 | 0.01 |       |      |       |      |      |      |       |      |      |      |  |  |       |      |       |      |       |      |  |
|       |      |       |      |       |      |       |      |       |      | 17472 | 0.00 |       |      |       |      |      |      |       |      |      |      |  |  |       |      |       |      |       |      |  |

Table S2: Decay curves of the analyzed alexandrite samples.

| LGAx1          |           | LGAx2          |           | LGAx3          |           | LGAx4          |           | LGAx5          |           | NatAx1         |           | NatAx2         |           | NatAx3         |           | NatAx4         |           | NatAx5         |           | NatAx6         |           |
|----------------|-----------|----------------|-----------|----------------|-----------|----------------|-----------|----------------|-----------|----------------|-----------|----------------|-----------|----------------|-----------|----------------|-----------|----------------|-----------|----------------|-----------|
| Time<br>(10nm) | Intensity |
| 0              | 97.51     | 0              | 100.00    | 0              | 100.00    | 0              | 99.91     | 0              | 100.00    | 0              | 100.00    | 0              | 99.96     | 0              | 100.00    | 0              | 100.00    | 0              | 100.00    | 0              | 100.00    |
| 235            | 25.32     | 224            | 17.74     | 215            | 92.48     | 185            | 91.09     | 204            | 14.53     | 270            | 4.99      | 269            | 7.64      | 135            | 3.96      | 269            | 5.83      | 270            | 2.65      | 270            | 41.08     |
| 470            | 9.44      | 374            | 7.20      | 386            | 6.18      | 370            | 14.28     | 409            | 11.41     | 405            | 2.50      | 404            | 2.40      | 405            | 2.65      | 404            | 4.84      | 404            | 2.49      | 404            | 1.95      |
| 705            | 8.66      | 599            | 6.15      | 601            | 5.16      | 555            | 9.66      | 572            | 10.59     | 675            | 2.15      | 674            | 2.02      | 540            | 2.41      | 539            | 4.64      | 674            | 2.10      | 674            | 1.49      |
| 940            | 8.21      | 823            | 5.47      | 772            | 4.69      | 924            | 8.58      | 777            | 10.05     | 810            | 2.07      | 809            | 1.84      | 810            | 2.13      | 809            | 4.23      | 809            | 1.95      | 809            | 1.33      |
| 1175           | 7.79      | 973            | 5.21      | 987            | 4.56      | 1109           | 8.07      | 981            | 9.51      | 1080           | 1.78      | 1079           | 1.66      | 945            | 1.90      | 944            | 4.04      | 944            | 1.90      | 1079           | 1.16      |
| 1410           | 7.40      | 1198           | 4.50      | 1201           | 4.09      | 1294           | 7.43      | 1186           | 8.83      | 1215           | 1.73      | 1214           | 1.50      | 1214           | 1.83      | 1214           | 3.70      | 1214           | 1.63      | 1214           | 1.09      |
| 1645           | 6.94      | 1348           | 4.25      | 1373           | 3.73      | 1479           | 7.27      | 1390           | 8.49      | 1349           | 1.57      | 1349           | 1.52      | 1349           | 1.63      | 1349           | 3.56      | 1349           | 1.53      | 1349           | 0.93      |
| 1879           | 6.69      | 1572           | 3.93      | 1588           | 3.36      | 1664           | 6.95      | 1554           | 8.37      | 1619           | 1.47      | 1618           | 1.39      | 1484           | 1.53      | 1618           | 3.34      | 1619           | 1.40      | 1619           | 0.90      |
| 2114           | 6.32      | 1797           | 3.66      | 1759           | 3.17      | 1849           | 6.76      | 1758           | 7.96      | 1754           | 1.40      | 1753           | 1.30      | 1754           | 1.46      | 1753           | 3.17      | 1753           | 1.29      | 1753           | 0.75      |
| 2349           | 5.86      | 1947           | 3.21      | 1974           | 3.06      | 2034           | 6.54      | 1963           | 7.35      | 2024           | 1.24      | 2023           | 1.08      | 1889           | 1.37      | 2023           | 2.90      | 2023           | 1.19      | 2023           | 0.68      |
| 2584           | 5.71      | 2172           | 2.99      | 2145           | 2.92      | 2219           | 6.13      | 2167           | 6.95      | 2159           | 1.16      | 2158           | 1.01      | 2159           | 1.25      | 2158           | 2.78      | 2158           | 1.09      | 2158           | 0.59      |
| 2819           | 5.51      | 2396           | 2.72      | 2360           | 2.58      | 2404           | 5.90      | 2372           | 6.81      | 2429           | 1.05      | 2428           | 0.92      | 2294           | 1.22      | 2428           | 2.59      | 2428           | 0.92      | 2428           | 0.57      |
| 3054           | 5.05      | 2546           | 2.43      | 2574           | 2.50      | 2589           | 5.73      | 2576           | 6.32      | 2564           | 1.04      | 2563           | 0.85      | 2563           | 1.18      | 2563           | 2.38      | 2563           | 0.99      | 2563           | 0.55      |
| 3289           | 4.90      | 2771           | 2.32      | 2746           | 2.27      | 2773           | 5.43      | 2740           | 6.11      | 2833           | 0.96      | 2832           | 0.82      | 2698           | 1.03      | 2832           | 2.31      | 2833           | 0.85      | 2833           | 0.45      |
| 3524           | 4.71      | 2921           | 2.33      | 2960           | 2.27      | 2958           | 5.11      | 2945           | 5.94      | 2968           | 0.86      | 2967           | 0.75      | 2968           | 0.94      | 2967           | 2.16      | 2968           | 0.79      | 2968           | 0.39      |
| 3759           | 4.43      | 3145           | 2.06      | 3132           | 1.97      | 3143           | 4.87      | 3149           | 5.68      | 3238           | 0.83      | 3237           | 0.68      | 3103           | 0.76      | 3102           | 2.16      | 3237           | 0.71      | 3237           | 0.32      |
| 3994           | 4.21      | 3370           | 1.98      | 3346           | 1.75      | 3328           | 4.58      | 3354           | 5.65      | 3373           | 0.74      | 3372           | 0.54      | 3373           | 0.76      | 3372           | 2.00      | 3372           | 0.71      | 3372           | 0.36      |
| 4228           | 4.08      | 3520           | 1.85      | 3561           | 1.58      | 3513           | 4.45      | 3558           | 5.14      | 3508           | 0.76      | 3642           | 0.51      | 3508           | 0.71      | 3507           | 1.87      | 3507           | 0.60      | 3642           | 0.26      |
| 4463           | 3.88      | 3745           | 1.52      | 3733           | 1.58      | 3698           | 4.29      | 3722           | 5.29      | 3778           | 0.69      | 3777           | 0.61      | 3643           | 0.69      | 3777           | 1.68      | 3777           | 0.60      | 3777           | 0.33      |
| 4698           | 3.57      | 3969           | 1.45      | 3947           | 1.55      | 4068           | 3.94      | 3926           | 4.84      | 3913           | 0.62      | 3912           | 0.55      | 3912           | 0.70      | 3912           | 1.65      | 3912           | 0.55      | 3912           | 0.26      |
| 4933           | 3.45      | 4119           | 1.33      | 4119           | 1.17      | 4253           | 3.56      | 4131           | 4.28      | 4182           | 0.56      | 4181           | 0.48      | 4047           | 0.63      | 4181           | 1.53      | 4182           | 0.50      | 4182           | 0.18      |
| 5168           | 3.20      | 4344           | 1.08      | 4333           | 1.18      | 4438           | 3.38      | 4335           | 4.26      | 4317           | 0.49      | 4316           | 0.47      | 4317           | 0.52      | 4316           | 1.48      | 4317           | 0.50      | 4317           | 0.14      |
| 5403           | 3.05      | 4494           | 1.13      | 4505           | 1.08      | 4622           | 3.32      | 4540           | 4.17      | 4587           | 0.50      | 4586           | 0.39      | 4452           | 0.55      | 4586           | 1.33      | 4586           | 0.44      | 4586           | 0.08      |
| 5638           | 2.92      | 4718           | 1.12      | 4719           | 1.03      | 4807           | 3.20      | 4703           | 3.93      | 4722           | 0.44      | 4721           | 0.37      | 4722           | 0.49      | 4721           | 1.33      | 4721           | 0.41      | 4721           | 0.14      |
| 5873           | 2.93      | 4943           | 0.97      | 4934           | 1.04      | 4992           | 3.14      | 4908           | 3.68      | 4992           | 0.40      | 4991           | 0.28      | 4857           | 0.40      | 4991           | 1.30      | 4991           | 0.33      | 4991           | 0.06      |
| 6108           | 2.75      | 5093           | 1.04      | 5105           | 0.79      | 5177           | 2.71      | 5112           | 3.50      | 5127           | 0.39      | 5126           | 0.31      | 5126           | 0.41      | 5126           | 1.23      | 5126           | 0.36      | 5126           | 0.09      |
| 6343           | 2.56      | 5317           | 0.90      | 5320           | 0.81      | 5362           | 2.95      | 5317           | 3.31      | 5396           | 0.37      | 5396           | 0.22      | 5261           | 0.27      | 5261           | 1.11      | 5396           | 0.30      | 5396           | 0.12      |
| 6577           | 2.45      | 5542           | 0.76      | 5491           | 0.67      | 5547           | 2.70      | 5521           | 3.36      | 5531           | 0.32      | 5530           | 0.29      | 5531           | 0.31      | 5530           | 1.09      | 5531           | 0.28      | 5531           | 0.00      |
| 6812           | 2.30      | 5692           | 0.76      | 5706           | 0.71      | 5732           | 2.57      | 5685           | 3.45      | 5666           | 0.36      | 5800           | 0.28      | 5666           | 0.30      | 5665           | 1.04      | 5666           | 0.30      | 5800           | 0.04      |
| 7047           | 2.28      | 5917           | 0.64      | 5878           | 0.73      | 5917           | 2.45      | 5889           | 3.21      | 5936           | 0.30      | 5935           | 0.25      | 5801           | 0.24      | 5935           | 0.96      | 5935           | 0.24      | 5935           | 0.02      |
| 7282           | 2.12      | 6066           | 0.49      | 6092           | 0.65      | 6102           | 2.34      | 6094           | 2.80      | 6071           | 0.26      | 6070           | 0.23      | 6071           | 0.21      | 6070           | 0.95      | 6070           | 0.23      | 6070           | 0.02      |
| 7517           | 2.15      | 6291           | 0.61      | 6307           | 0.36      | 6287           | 2.12      | 6298           | 2.74      | 6341           | 0.25      | 6340           | 0.14      | 6206           | 0.28      | 6340           | 0.88      | 6340           | 0.22      | 6340           | 0.02      |
| 7752           | 2.02      | 6516           | 0.50      | 6478           | 0.36      | 6471           | 2.31      | 6503           | 2.45      | 6476           | 0.24      | 6475           | 0.18      | 6475           | 0.24      | 6475           | 0.79      | 6475           | 0.16      | 6475           | 0.00      |
| 7987           | 1.71      | 6666           | 0.49      | 6693           | 0.31      | 6656           | 2.21      | 6666           | 2.53      | 6745           | 0.23      | 6745           | 0.16      | 6610           | 0.16      | 6745           | 0.75      | 6745           | 0.19      | 6745           | 0.01      |
| 8222           | 1.84      | 6890           | 0.50      | 6864           | 0.52      | 6841           | 1.86      | 6871           | 2.39      | 6880           | 0.21      | 6879           | 0.21      | 6880           | 0.20      | 6879           | 0.74      | 6880           | 0.13      | 6880           | 0.02      |
| 8457           | 1.56      | 7040           | 0.45      | 7079           | 0.35      | 7026           | 1.66      | 7075           | 2.35      | 7150           | 0.18      | 7149           | 0.06      | 7015           | 0.13      | 7149           | 0.66      | 7149           | 0.17      |                |           |
| 8692           | 1.63      | 7265           | 0.22      | 7293           | 0.32      | 7396           | 1.57      | 7280           | 2.19      | 7285           | 0.15      | 7284           | 0.06      | 7285           | 0.08      | 7284           | 0.68      | 7284           | 0.14      |                |           |
| 8926           | 1.68      | 7490           | 0.33      | 7465           | 0.22      | 7581           | 1.74      | 7484           | 2.19      | 7555           | 0.14      | 7554           | 0.00      | 7420           | 0.15      | 7419           | 0.60      | 7554           | 0.12      |                |           |
| 9161           | 1.44      | 7639           | 0.25      | 7679           | 0.00      | 7766           | 1.37      | 7648           | 2.03      | 7690           | 0.15      | 7689           | 0.05      | 7690           | 0.09      | 7689           | 0.56      | 7689           | 0.09      |                |           |
| 9396           | 1.45      | 7864           | 0.08      | 7851           | 0.19      | 7951           | 1.31      | 7853           | 2.01      | 7825           | 0.11      |                |           | 7824           | 0.07      | 7824           | 0.51      | 7824           | 0.12      |                |           |
| 9631           | 1.42      | 8089           | 0.35      | 8065           | 0.23      | 8136           | 1.39      | 8057           | 1.82      | 8094           | 0.11      |                |           | 7959           | 0.08      | 8094           | 0.52      | 8094           | 0.07      |                |           |
| 9866           | 1.27      | 8239           | 0.14      | 8237           | 0.15      | 8320           | 1.37      | 8262           | 1.82      | 8229           | 0.09      |                |           | 8229           | 0.00      | 8228           | 0.49      | 8229           | 0.10      |                |           |
| 10101          | 1.30      | 8463           | 0.19      | 8452           | 0.03      | 8505           | 1.34      | 8466           | 1.70      | 8499           | 0.10      |                |           | 8364           | 0.08      | 8498           | 0.46      | 8498           | 0.09      |                |           |
| 10336          | 1.14      | 8613           | 0.10      | 8666           | 0.09      | 8690           | 1.15      | 8630           | 1.78      | 8634           | 0.10      |                |           | 8634           | 0.09      | 8633           | 0.45      | 8633           | 0.03      |                |           |
| 10571          | 1.12      | 8838           | 0.14      |                |           | 8875           | 1.20      | 8834           | 1.54      | 8904           | 0.09      |                |           | 8769           | 0.00      | 8903           | 0.42      | 8903           | 0.05      |                |           |
| 10806          | 1.03      | 9062           | 0.15      |                |           | 9060           | 1.15      | 9039           | 1.35      | 9039           | 0.01      |                |           | 9039           | 0.02      | 9038           | 0.39      | 9038           | 0.06      |                |           |

|       |      |      |      |       |       |       |      |       |      |       |      |       |      |
|-------|------|------|------|-------|-------|-------|------|-------|------|-------|------|-------|------|
| 11041 | 1.05 | 9212 | 0.18 | 9245  | 0.97  | 9243  | 1.18 | 9309  | 0.06 | 9308  | 0.34 | 9308  | 0.04 |
| 11275 | 0.96 | 9437 | 0.12 | 9430  | 0.97  | 9448  | 1.24 | 9443  | 0.06 | 9443  | 0.34 | 9443  | 0.04 |
| 11510 | 0.89 | 9662 | 0.00 | 9615  | 0.84  | 9611  | 1.47 | 9713  | 0.02 | 9577  | 0.29 | 9713  | 0.06 |
| 11745 | 1.06 | 9811 | 0.03 | 9800  | 0.89  | 9816  | 1.20 | 9848  | 0.04 | 9847  | 0.31 | 9847  | 0.03 |
| 11980 | 1.02 |      |      | 9985  | 0.63  | 10020 | 1.13 | 10118 | 0.00 | 9982  | 0.30 | 9982  | 0.00 |
| 12215 | 0.83 |      |      | 10169 | 0.69  | 10225 | 1.07 | 10253 | 0.03 | 10252 | 0.28 | 10252 | 0.01 |
| 12450 | 0.68 |      |      | 10539 | 0.67  | 10429 | 0.95 | 10388 | 0.03 | 10387 | 0.25 | 10387 | 0.01 |
| 12685 | 0.82 |      |      | 10724 | 0.45  | 10593 | 0.87 | 10658 | 0.04 | 10657 | 0.25 |       |      |
| 12920 | 0.73 |      |      | 10909 | 0.67  | 10797 | 0.94 | 10792 | 0.01 | 10792 | 0.20 |       |      |
| 13155 | 0.81 |      |      | 11094 | 0.48  | 11002 | 0.97 |       |      | 11061 | 0.19 |       |      |
| 13390 | 0.61 |      |      | 11279 | 0.48  | 11206 | 0.82 |       |      | 11196 | 0.17 |       |      |
| 13624 | 0.62 |      |      | 11464 | 0.44  | 11411 | 0.84 |       |      | 11466 | 0.14 |       |      |
| 13859 | 0.64 |      |      | 11649 | 0.46  | 11574 | 0.92 |       |      | 11601 | 0.20 |       |      |
| 14094 | 0.58 |      |      | 11834 | 0.36  | 11779 | 0.77 |       |      | 11736 | 0.13 |       |      |
| 14329 | 0.69 |      |      | 12018 | 0.30  | 11983 | 0.77 |       |      | 12006 | 0.16 |       |      |
| 14564 | 0.62 |      |      | 12203 | 0.30  | 12188 | 0.57 |       |      | 12141 | 0.13 |       |      |
| 14799 | 0.45 |      |      | 12388 | 0.18  | 12392 | 0.47 |       |      | 12410 | 0.11 |       |      |
| 15034 | 0.52 |      |      | 12573 | 0.36  | 12556 | 0.64 |       |      | 12545 | 0.12 |       |      |
|       |      |      |      | 12758 | 0.10  | 12761 | 0.67 |       |      | 12815 | 0.10 |       |      |
|       |      |      |      | 12943 | 0.01  | 12965 | 0.52 |       |      | 12950 | 0.10 |       |      |
|       |      |      |      | 13128 | 0.24  | 13170 | 0.77 |       |      | 13220 | 0.10 |       |      |
|       |      |      |      | 13313 | 0.13  | 13374 | 0.52 |       |      | 13355 | 0.06 |       |      |
|       |      |      |      | 13683 | -0.01 | 13538 | 0.47 |       |      | 13624 | 0.07 |       |      |
|       |      |      |      | 13867 | 0.01  | 13742 | 0.29 |       |      | 13759 | 0.06 |       |      |
|       |      |      |      | 14052 | 0.12  | 13947 | 0.43 |       |      | 14029 | 0.10 |       |      |
|       |      |      |      | 14237 | -0.01 | 14151 | 0.32 |       |      | 14164 | 0.04 |       |      |
|       |      |      |      | 14422 | -0.09 | 14356 | 0.38 |       |      | 14299 | 0.06 |       |      |
|       |      |      |      | 14607 | 0.00  | 14519 | 0.31 |       |      | 14569 | 0.06 |       |      |
|       |      |      |      |       |       | 14724 | 0.28 |       |      | 14704 | 0.03 |       |      |
|       |      |      |      |       |       | 14928 | 0.08 |       |      | 14973 | 0.02 |       |      |
|       |      |      |      |       |       | 15133 | 0.12 |       |      | 15108 | 0.02 |       |      |
|       |      |      |      |       |       | 15337 | 0.19 |       |      | 15378 | 0.05 |       |      |
|       |      |      |      |       |       | 15501 | 0.10 |       |      | 15513 | 0.00 |       |      |
|       |      |      |      |       |       | 15705 | 0.13 |       |      | 15783 | 0.02 |       |      |
|       |      |      |      |       |       | 15910 | 0.00 |       |      | 15918 | 0.03 |       |      |
|       |      |      |      |       |       | 16114 | 0.11 |       |      | 16188 | 0.05 |       |      |
|       |      |      |      |       |       | 16319 | 0.27 |       |      | 16322 | 0.02 |       |      |
|       |      |      |      |       |       | 16482 | 0.37 |       |      |       |      |       |      |
